# Supplementary material for: Comparison of Proteomic Technologies for Blood-Based Detection of Colorectal Cancer
Source: PubMed Central journal article supplement (PMC7865621; doi:10.3390/ijms22031189), 2021-01-26
Supplement: ijms-22-01189-s001.pdf [file ijms-22-01189-s001.pdf]

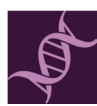

**Table S1:** Diagnostic performance for markers overlapping from PEA and IpA measurements for detecting CRC cases from participants of screening colonoscopy

| Marker | Pearson's Correlation Coefficient | Proximity extension assay measurements |       |                      |                |                | Immunome protein array measurements |       |                      |                |                | DeLong p-value for AUC testing |
|--------|-----------------------------------|----------------------------------------|-------|----------------------|----------------|----------------|-------------------------------------|-------|----------------------|----------------|----------------|--------------------------------|
|        |                                   | AUC (95% CI)                           | p-val | p-val <sup>adj</sup> | Sn % at 80% Sp | Sn % at 90% Sp | AUC (95% CI)                        | p-val | p-val <sup>adj</sup> | Sn % at 80% Sp | Sn % at 90% Sp |                                |
| ANXA1  | -0.06                             | 0.53 (0.38-0.68)                       | 0.65  | 0.76                 | 13             | 5              | 0.56 (0.41-0.71)                    | 0.43  | 0.79                 | 15             | 7              | 0.38                           |
| ARNT   | 0.08                              | 0.55 (0.44-0.66)                       | 0.37  | 0.76                 | 13             | 5              | 0.56 (0.41-0.71)                    | 0.41  | 0.79                 | 14             | 7              | 0.24                           |
| BIRC2  | 0.10                              | 0.47 (0.37-0.56)                       | 0.52  | 0.76                 | 13             | 5              | 0.58 (0.43-0.73)                    | 0.29  | 0.79                 | 15             | 7              | 0.59                           |
| CAIX   | 0.06                              | 0.51 (0.36-0.66)                       | 0.90  | 0.92                 | 15             | 9              | 0.51 (0.36-0.66)                    | 0.85  | 0.88                 | 12             | 5              | 0.97                           |
| CASP3  | -0.08                             | 0.53 (0.38-0.69)                       | 0.66  | 0.76                 | 14             | 5              | 0.55 (0.40-0.70)                    | 0.49  | 0.79                 | 14             | 7              | 0.43                           |
| CSTB   | 0.18                              | 0.56 (0.41-0.71)                       | 0.46  | 0.76                 | 16             | 5              | 0.56 (0.41-0.71)                    | 0.41  | 0.79                 | 14             | 7              | 0.27                           |
| EGFR   | 0.06                              | 0.47 (0.32-0.62)                       | 0.69  | 0.76                 | 15             | 7              | 0.52 (0.37-0.67)                    | 0.79  | 0.85                 | 16             | 7              | 0.95                           |
| EPCAM  | -0.19                             | 0.58 (0.43-0.73)                       | 0.29  | 0.76                 | 20             | 10             | 0.56 (0.41-0.71)                    | 0.42  | 0.79                 | 15             | 9              | 0.86                           |
| EPHA2  | -0.03                             | 0.54 (0.39-0.69)                       | 0.62  | 0.76                 | 18             | 10             | 0.57 (0.42-0.72)                    | 0.35  | 0.79                 | 15             | 6              | 0.31                           |
| EPHB4  | 0.10                              | 0.58 (0.43-0.73)                       | 0.29  | 0.76                 | 19             | 11             | 0.57 (0.42-0.72)                    | 0.34  | 0.79                 | 14             | 7              | 0.15                           |
| ERBB3  | 0.15                              | 0.53 (0.38-0.68)                       | 0.65  | 0.76                 | 12             | 6              | 0.56 (0.41-0.71)                    | 0.43  | 0.79                 | 14             | 7              | 0.38                           |
| FADD   | -0.04                             | 0.56 (0.42-0.71)                       | 0.41  | 0.76                 | 18             | 7              | 0.55 (0.41-0.7)                     | 0.48  | 0.79                 | 18             | 11             | 0.27                           |
| FAS    | -0.12                             | 0.58 (0.44-0.73)                       | 0.27  | 0.76                 | 19             | 13             | 0.55 (0.40-0.70)                    | 0.48  | 0.79                 | 14             | 7              | 0.20                           |
| IRAK4  | -0.01                             | 0.48 (0.33-0.63)                       | 0.80  | 0.86                 | 12             | 4              | 0.59 (0.44-0.74)                    | 0.25  | 0.79                 | 15             | 7              | 0.53                           |
| ITGB6  | 0.21                              | 0.49 (0.34-0.64)                       | 0.94  | 0.94                 | 18             | 10             | 0.56 (0.41-0.71)                    | 0.41  | 0.79                 | 13             | 6              | 0.61                           |
| LYN    | -0.10                             | 0.58 (0.44-0.73)                       | 0.27  | 0.76                 | 19             | 8              | 0.58 (0.43-0.73)                    | 0.31  | 0.81                 | 30             | 6              | 0.13                           |
| SMAD5  | 0.04                              | 0.53 (0.38-0.68)                       | 0.69  | 0.76                 | 16             | 8              | 0.58 (0.44-0.73)                    | 0.27  | 0.79                 | 14             | 7              | 0.28                           |
| NF2    | 0.05                              | 0.55 (0.41-0.70)                       | 0.47  | 0.76                 | 12             | 5              | 0.58 (0.43-0.73)                    | 0.31  | 0.79                 | 15             | 7              | 0.22                           |
| PRDX1  | -0.03                             | 0.53 (0.38-0.68)                       | 0.66  | 0.76                 | 13             | 5              | 0.49 (0.34-0.64)                    | 0.94  | 0.94                 | 19             | 10             | 0.81                           |
| SPARC  | 0.28                              | 0.51 (0.36-0.66)                       | 0.90  | 0.92                 | 12             | 6              | 0.54 (0.39-0.69)                    | 0.63  | 0.79                 | 17             | 8              | 0.67                           |
| TCL1A  | -0.11                             | 0.57 (0.42-0.72)                       | 0.35  | 0.76                 | 18             | 9              | 0.54 (0.39-0.69)                    | 0.63  | 0.79                 | 14             | 6              | 0.32                           |
| TGFR2  | 0.09                              | 0.54(0.39-0.69)                        | 0.58  | 0.76                 | 15             | 7              | 0.54 (0.39-0.69)                    | 0.63  | 0.79                 | 14             | 6              | 0.47                           |
| TRAF2  | 0.02                              | 0.57 (0.42-0.72)                       | 0.35  | 0.76                 | 16             | 7              | 0.52 (0.37-0.67)                    | 0.82  | 0.86                 | 18             | 10             | 0.62                           |
| ZBTB16 | 0.12                              | 0.54 (0.39-0.69)                       | 0.64  | 0.76                 | 14             | 6              | 0.56 (0.41-0.71)                    | 0.41  | 0.79                 | 16             | 7              | 0.81                           |

Abbreviations: AUC–area under the receiver operating curve; CRC–colorectal cancer; 95% CI–95% confidence interval; IpA– immunome protein array; PEA–proximity extension assay; p-val–apparent p-values without any adjustments; p-val<sup>adj</sup>–p-value after adjustment for multiple testing by Benjamini Hochberg method; Se–sensitivity; Sp–specificity. All proteins abbreviations: ANXA1– Annexin A1; ARNT– Aryl hydrocarbon receptor nuclear translocator; BIRC2– Baculoviral IAP repeat-containing protein 2; CAIX– Carbonic anhydrase IX; CASP3– Caspase-3; CSTB– Cystatin-B; EGFR– Epidermal growth factor receptor;; EPCAM– Epithelial cell adhesion molecule; EPHA2– Ephrin type-A receptor 2; EPHB4– Ephrin type-B receptor 4; ERBB3– Receptor tyrosine-protein kinase erbB-3; FADD– FAS-associated death domain protein; FAS– Tumor necrosis factor receptor superfamily member 6; IRAK4– Interleukin-1 receptor-associated kinase 4; ITGB6– Integrin beta-6; LYN– Tyrosine-protein kinase Lyn; NF2– Merlin; PRDX1– Peroxiredoxin-1; SMAD5– Mothers against decapentaplegic homolog 5; SPARC– Protein SPARC; TCL1A– T-cell leukemia / lymphoma protein 1A; TGFR2– TGF-beta receptor type-2; TRAF2– TNF receptor-associated factor 2; ZBTB16– Zinc finger and BTB domain-containing protein 16.
